# Supplementary material for: Engineering Efficient Self-Assembled Plasmonic Nanostructures by Configuring Metallic Nanoparticle’s Morphology
Source: MDPI journal article supplement (doi:10.3390/ijms221910595), 2021-09-30
Supplement: s1 [file s1]

## Supplementary Materials

### **Engineering efficient self-assembled plasmonic nanostructures by configuring metallic nanoparticle's morphology**

Vasanthan Devaraj <sup>1,†</sup>, Jong-Min Lee <sup>1,2,†</sup>, Ye-ji Kim <sup>3</sup>, Hyuk Jeong <sup>1</sup> and Jin-Woo Oh <sup>1,3,4,\*</sup>

<sup>1</sup>Bio-IT Fusion Technology Research Institute, Pusan National University, Busan, 46241, Republic of Korea; devarajvasanthan@gmail.com

<sup>2</sup>School of Nanoconvergence Technology, Hallym University, Chuncheon, 24252, Republic of Korea; jongminlee1984@gmail.com

<sup>3</sup>Department of Nano Fusion Technology and BK21 Plus Nano Convergence Division, Pusan National University, Busan, 46241, Republic of Korea; kkyej0608@gmail.com

<sup>4</sup>Department of Nanoenergy Engineering, Pusan National University, Busan, 46241, Republic of Korea

\*Correspondence: ojw@pusan.ac.kr

<sup>†</sup>V.D. and J.-M.L contributed equally.

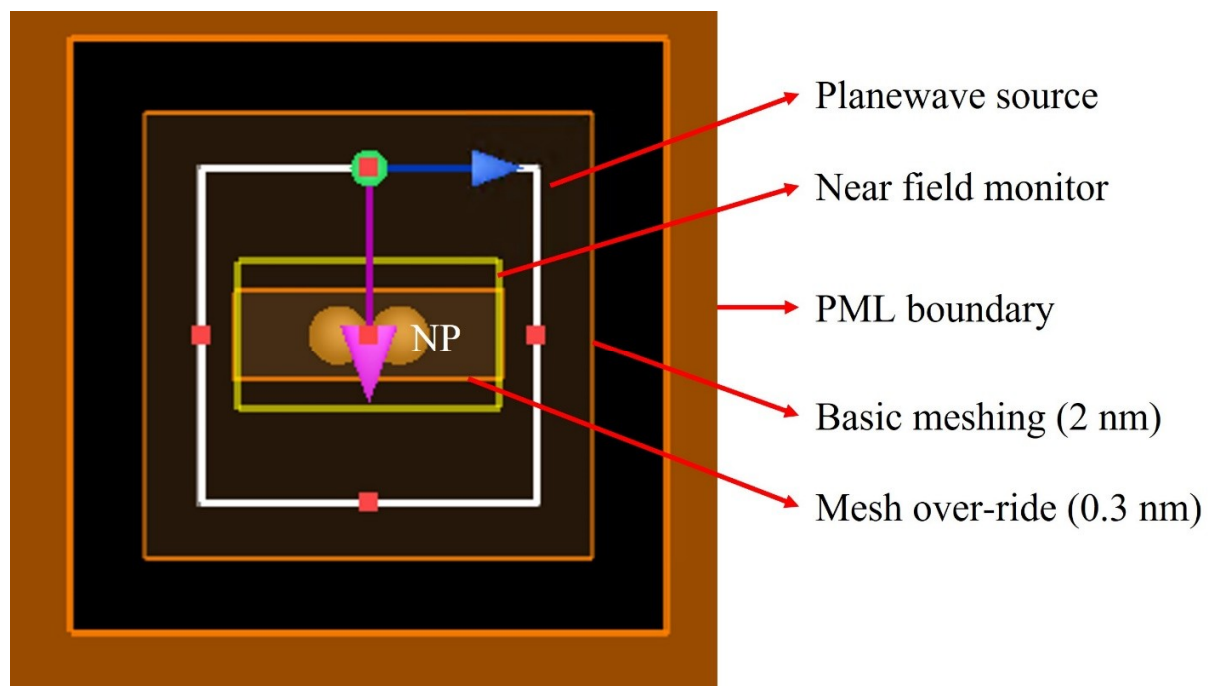

**Figure S1.** Modelling information which is used throughout our simulations.

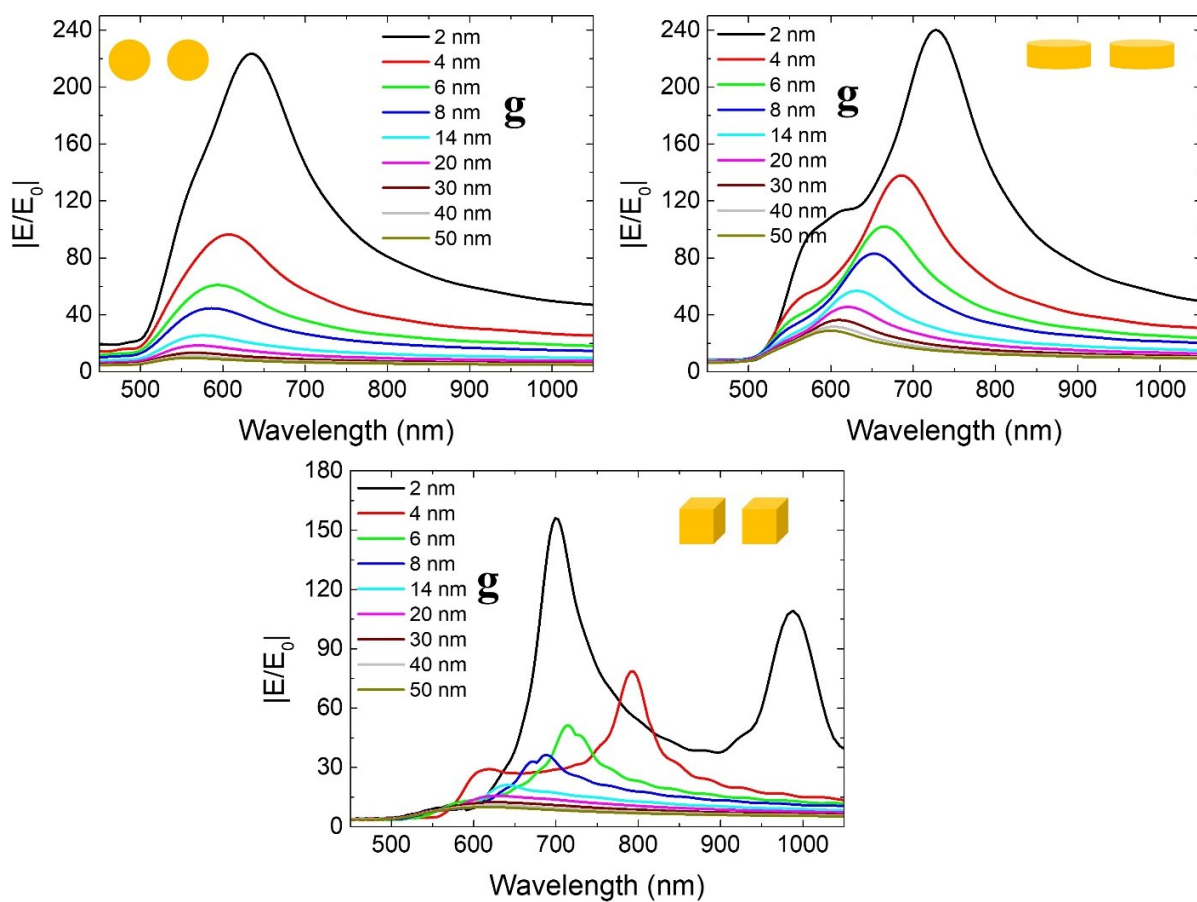

**Figure S2.** Simulated broadband near field spectra  $|E/E_0|$  for dimer nanostructures with NP shapes of a sphere (a), disk (b), and cube (c) as a function of gap size.

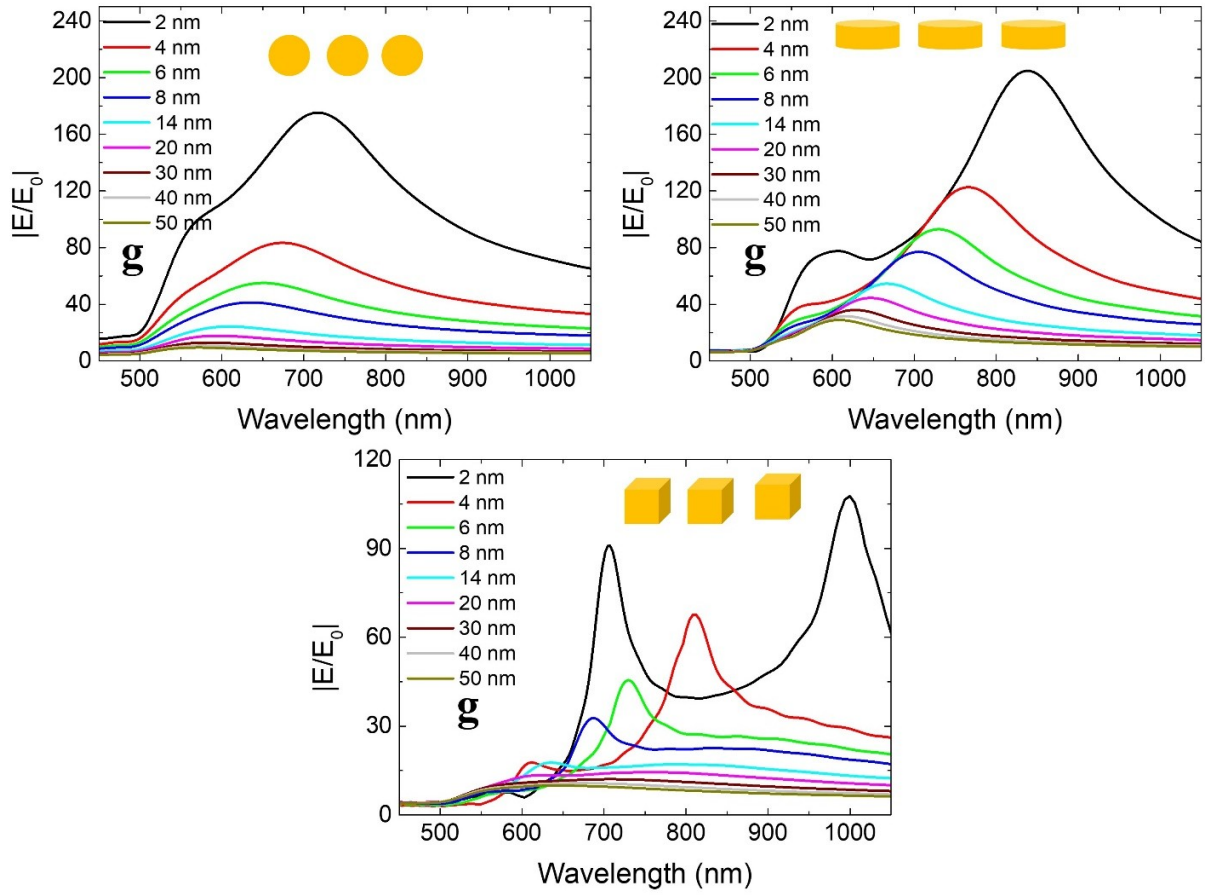

**Figure S3.** Simulated broadband near field spectra  $|E/E_0|$  for trimer nanostructures with NP shapes of a sphere (a), disk (b), and cube (c) as a function of gap size.

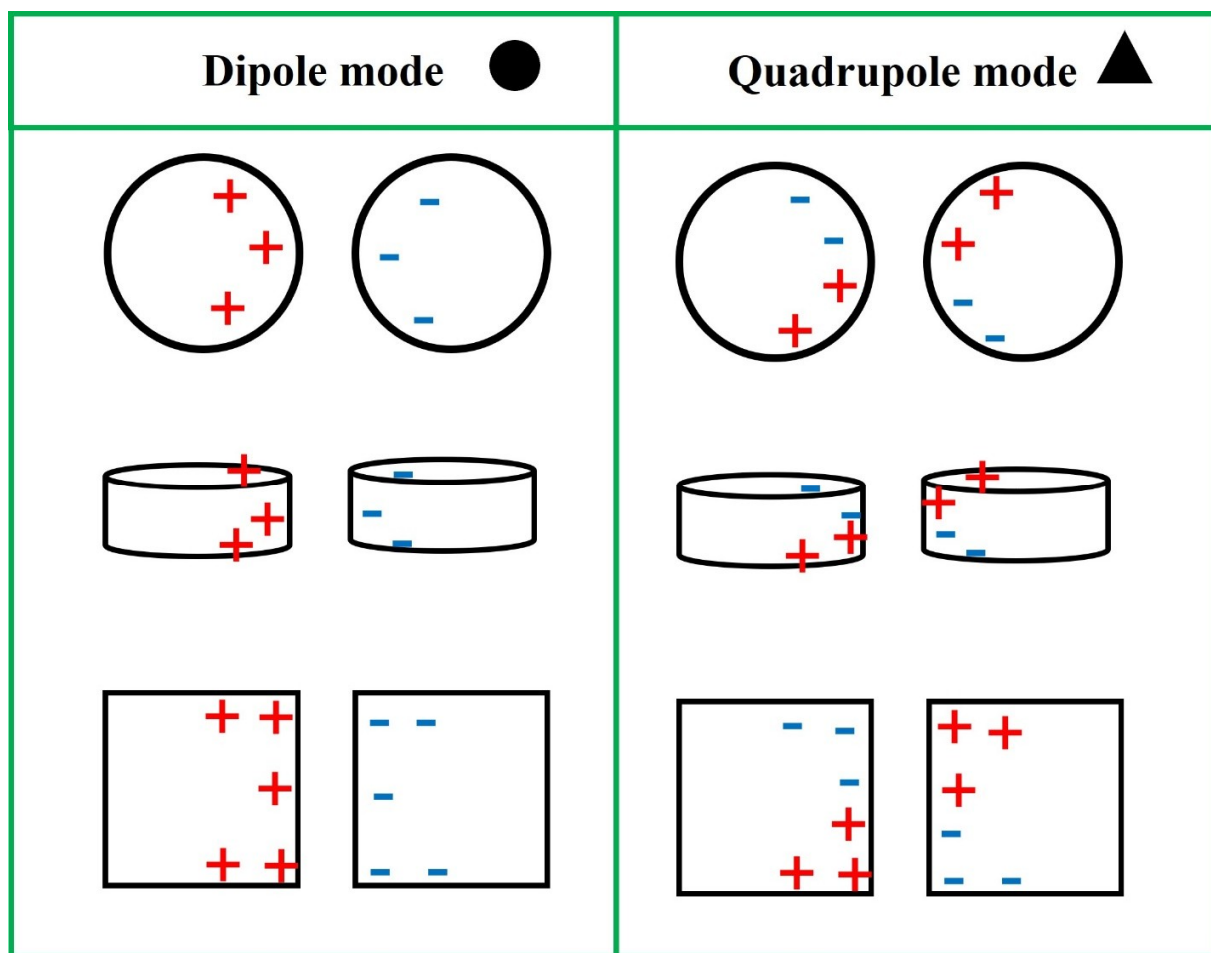

**Figure S4.** Schematic description of surface charge distributions reveals dipolar or quadrupolar modes in a plasmonic cavity region.

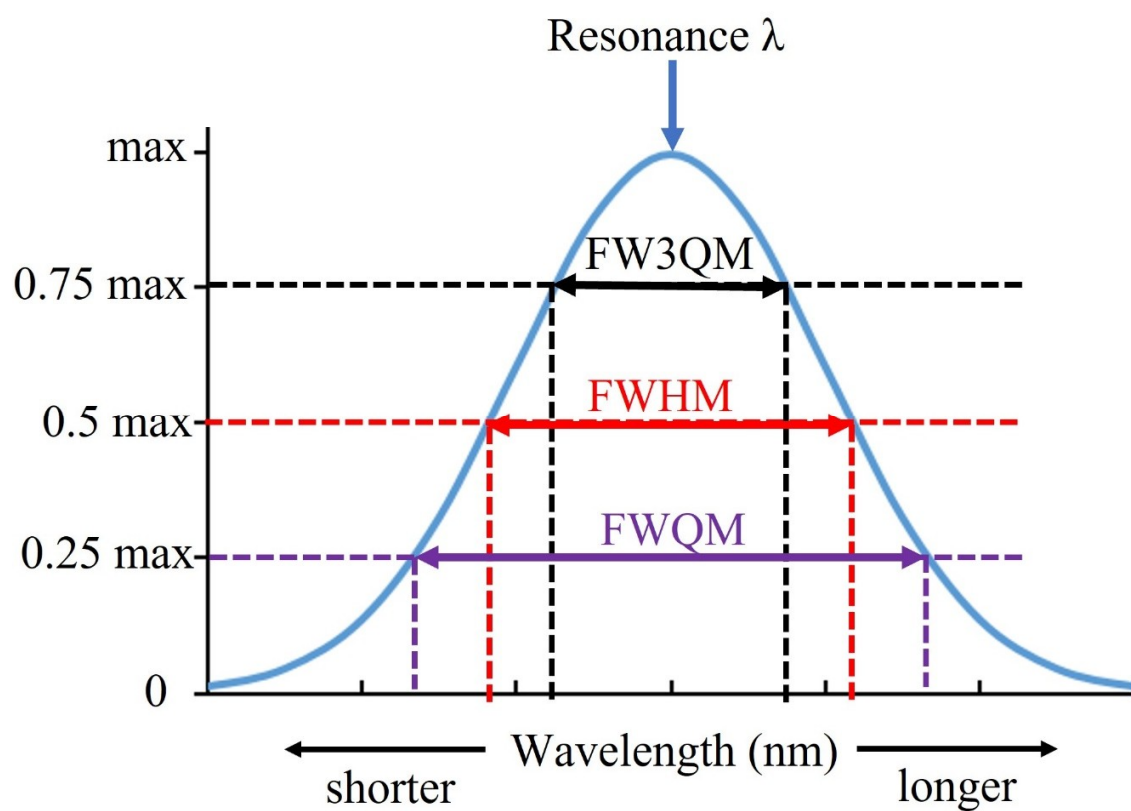

**Figure S5.** Data covering the FW3QM region in evaluating the broadband spectral performance of plasmonic nanostructures.

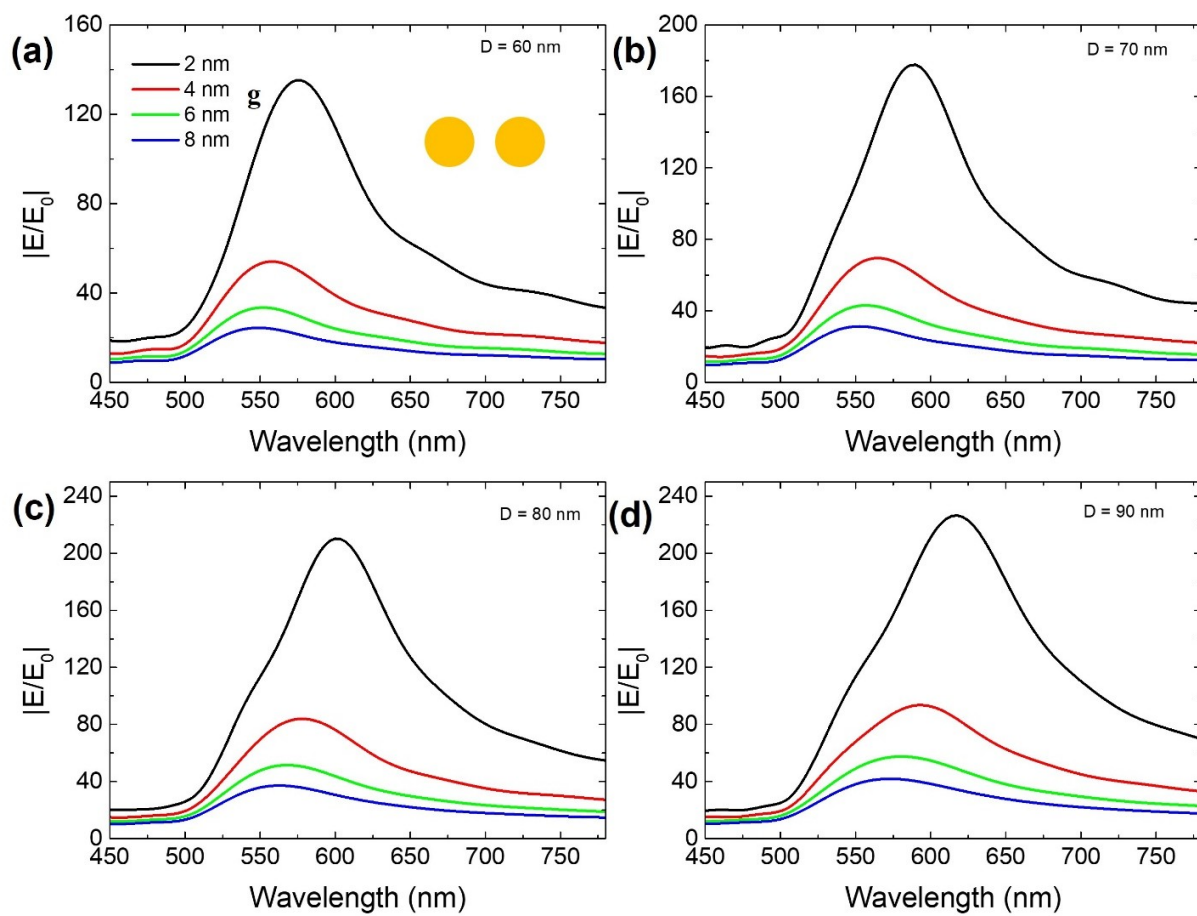

**Figure S6.** Simulated broadband gap-size dependent near field spectra  $|E/E_0|$  for sphere-based dimer nanostructures with different NP diameter: 60 nm (a), 70 nm (b), 80 nm (c) and 90 nm (d).

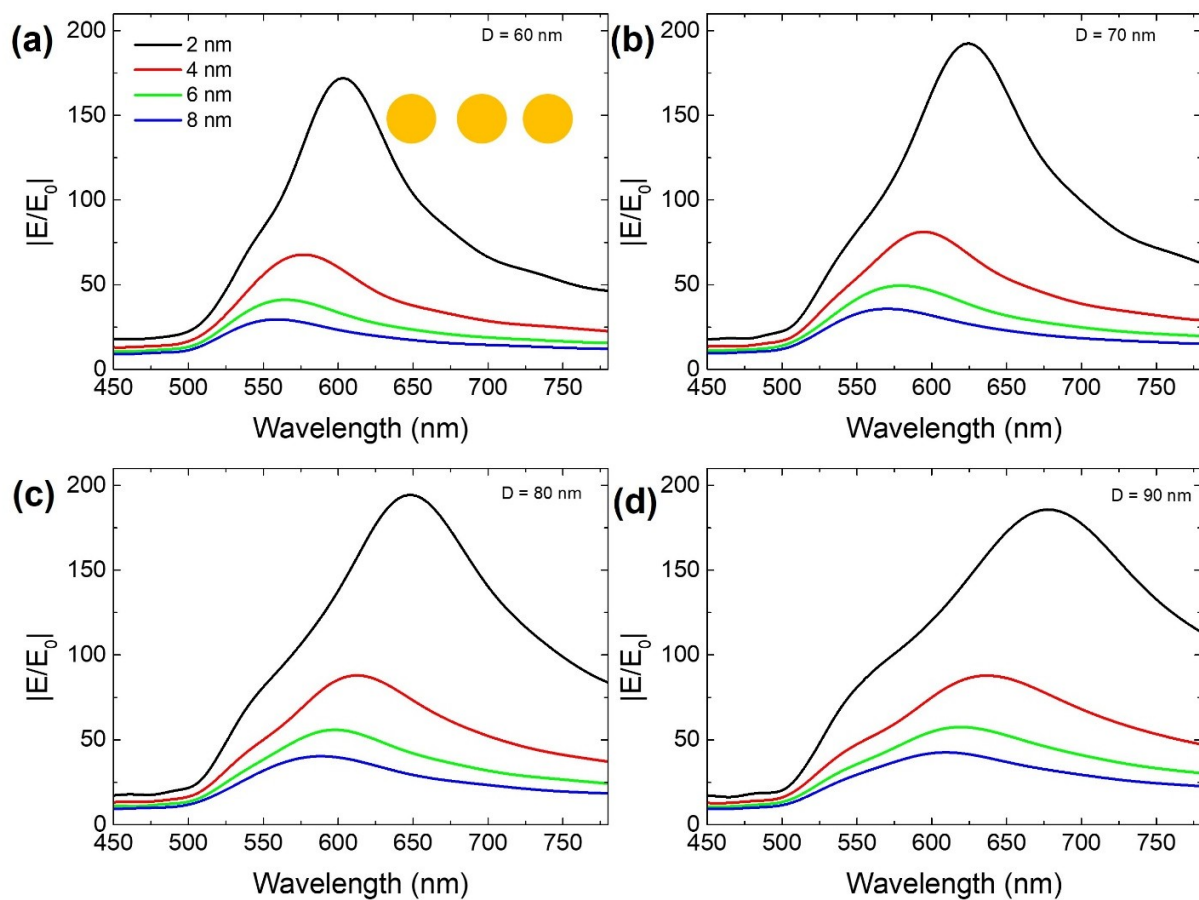

**Figure S7.** Simulated broadband gap-size dependent near field spectra  $|E/E_0|$  for sphere-based trimer nanostructures with different NP diameter: 60 nm (a), 70 nm (b), 80 nm (c) and 90 nm (d).



| Gap size (nm) | Max $ E/E_0 $ at Resonance $\lambda$ | 75% of max $ E/E_0 $ | 75% of max $ E/E_0 $ at shorter $\lambda$ (nm) | 75% of max $ E/E_0 $ at longer $\lambda$ (nm) | FW3QM (nm) |
|---------------|--------------------------------------|----------------------|------------------------------------------------|-----------------------------------------------|------------|
| Sphere dimer  |                                      |                      |                                                |                                               |            |
| 2             | 223                                  | 167.25               | 587                                            | 684                                           | 97         |
| 4             | 97                                   | 72.75                | 559                                            | 662                                           | 103        |
| 6             | 61                                   | 45.75                | 548                                            | 656                                           | 108        |
| 8             | 45                                   | 33.75                | 546                                            | 651                                           | 105        |
| Disk dimer    |                                      |                      |                                                |                                               |            |
| 2             | 240                                  | 180                  | 685                                            | 771                                           | 86         |
| 4             | 138                                  | 103.5                | 645                                            | 731                                           | 86         |
| 6             | 102                                  | 76.5                 | 626                                            | 708                                           | 82         |
| 8             | 83                                   | 62.25                | 614                                            | 696                                           | 82         |
| Cube dimer    |                                      |                      |                                                |                                               |            |
| 2             | 109                                  | 81.75                | 963                                            | 1014                                          | 51         |
| 4             | 79                                   | 59.25                | 775                                            | 810                                           | 35         |
| 6             | 52                                   | 39                   | 699                                            | 741                                           | 42         |
| 8             | 36                                   | 27                   | 658                                            | 716                                           | 58         |

**Table S1.** FW3QM calculation information for dimer nanostructures for different gap sizes.

| Gap size (nm) | Max $ E/E_0 $ at Resonance $\lambda$ | 75% of max $ E/E_0 $ | 75% of max $ E/E_0 $ at shorter $\lambda$ (nm) | 75% of max $ E/E_0 $ at longer $\lambda$ (nm) | FW3QM (nm) |
|---------------|--------------------------------------|----------------------|------------------------------------------------|-----------------------------------------------|------------|
| Sphere trimer |                                      |                      |                                                |                                               |            |
| 2             | 175                                  | 131.25               | 637                                            | 806                                           | 169        |
| 4             | 84                                   | 63                   | 596                                            | 769                                           | 173        |
| 6             | 55                                   | 41.25                | 577                                            | 752                                           | 175        |
| 8             | 42                                   | 31.5                 | 568                                            | 736                                           | 168        |
| Disk trimer   |                                      |                      |                                                |                                               |            |
| 2             | 205                                  | 153.75               | 775                                            | 909                                           | 134        |
| 4             | 123                                  | 92.25                | 708                                            | 836                                           | 128        |
| 6             | 93                                   | 69.75                | 674                                            | 797                                           | 123        |
| 8             | 77                                   | 57.75                | 653                                            | 772                                           | 119        |
| Cube trimer   |                                      |                      |                                                |                                               |            |
| 2             | 108                                  | 81                   | 970                                            | 1031                                          | 61         |
| 4             | 68                                   | 51                   | 788                                            | 832                                           | 44         |
| 6             | 46                                   | 34.5                 | 711                                            | 756                                           | 45         |
| 8             | 33                                   | 24.75                | 667                                            | 719                                           | 52         |

**Table S2.** FW3QM calculation information for trimer nanostructures for different gap sizes.
